# Supplementary material
Source: ML conference proceedings conference paper supplement (https://proceedings.mlr.press/v97/yang19b.html)
Supplement: Supplementary file [file yang19b-supp.pdf]

## A. Proofs of Propositions 1,2

*Proof of Proposition 1.* Let  $v^\pi$  be the value function of  $\pi$ . Since  $M \in \mathcal{M}^{trans}(\mathcal{S}, \mathcal{A}, \gamma, \phi)$ , we have  $P(s'|s, a) = \sum_{k \in [K]} \psi_k(s') \phi_k(s, a)$  for some  $\psi_k$ 's. We have

$$\begin{aligned} Q^\pi(s, a) &= r(s, a) + \gamma \sum_{s' \in \mathcal{S}} P(s'|s, a) v^\pi(s') = r(s, a) + \gamma \sum_{k \in [K]} \phi_k(s, a) \sum_{s' \in \mathcal{S}} \psi_k(s') v^\pi(s') \\ &= r(s, a) + \gamma \sum_{k \in [K]} \phi_k(s, a) w^\pi(k) \end{aligned}$$

where vector  $w^\pi \in \mathbb{R}^K$  is specified by

$$\forall k \in [K] : w^\pi(k) = \sum_{s' \in \mathcal{S}} \psi_k(s') v^\pi(s').$$

Therefore  $Q^\pi \in \text{Span}(r, \phi)$ . □

*Proof of Proposition 2.* “If” direction: Since  $M \in \mathcal{M}^{trans}$ , we have from the proof of Proposition 1 that for any  $Q \in \mathcal{F}$ ,  $\mathcal{T}Q \in \mathcal{F}$ .

“Only if” direction: If  $d(\mathcal{TF}, \mathcal{F}) = 0$ , then for any  $Q \in \mathcal{F}$  We have

$$\mathcal{T}Q = r + \gamma PV(Q) \in \mathcal{F}.$$

We can then pick a maximum-sized set  $\{Q_1, Q_2, \dots, Q_k\} \subset \mathcal{F}$  such that  $V(Q_1), V(Q_2), \dots, V(Q_k)$  are linear independent. Note that  $k \leq K$ . Denote  $A = [V(Q_1), V(Q_2), \dots, V(Q_k)]$ ,  $B = [\mathcal{T}Q_1, \mathcal{T}Q_2, \dots, \mathcal{T}Q_k]$  and  $R = [r, r, r, \dots, r]$  (with  $k$  columns). We then have

$$B = R + \gamma PA.$$

Hence we have

$$P = \gamma^{-1}(B - R)A^\top (AA^\top)^{-1}.$$

Since each column of  $B - R$  is a vector in  $\mathcal{F}$ , we conclude that each column of  $P$  is a vector in  $\mathcal{F}$ . □

## B. Proof of Theorem 1

*Proof of Theorem 1.* Let  $\mathcal{M}'$  be the class of all tabular DMDPs with state space  $\mathcal{S}'$ , action space  $\mathcal{A}'$ , and discount factor  $\gamma$ . Let  $\mathcal{K}'$  be an algorithm for such a class of DMDPs with a generative model. Let

$$N = O\left(\frac{|\mathcal{S}'||\mathcal{A}'|}{(1-\gamma)^3 \cdot \epsilon^2 \cdot \log \epsilon^{-1}}\right).$$

For each  $M' \in \mathcal{M}'$ , let  $\pi^{\mathcal{K}', M', N}$  be the policy returned by  $\mathcal{K}'$  with querying at most  $N$  samples from the generative model. The lower bound in Theorem B.3 in Sidford et al. (2018a) (which is derived from Theorem 3 in Azar et al. (2013)) states that

$$\inf_{\mathcal{K}'} \sup_{M' \in \mathcal{M}'} \mathbb{P} \left[ \sup_{s \in \mathcal{S}} (v^{*, M'}(s) - v^{\pi^{\mathcal{K}', M', N}}(s)) \geq \epsilon \right] \geq 1/3,$$

where  $v^{*, M'}$  is the optimal value function of  $M'$ . Suppose, without loss of generality,  $K = |\mathcal{S}'||\mathcal{A}'| + 1$ . We prove Theorem 1 by showing that every DMDP instance  $M' \in \mathcal{M}'$  can be converted to an instance  $M \in \mathcal{M}_K^{trans}(\mathcal{S}, \mathcal{A}, \gamma)$  such that any algorithm  $\mathcal{K}$  for  $\mathcal{M}_K^{trans}(\mathcal{S}, \mathcal{A}, \gamma)$  can be used to solve  $M'$ .

For a DMDP instance  $M' = (\mathcal{S}', \mathcal{A}', P', r', \gamma) \in \mathcal{M}'$ , we construct a corresponding DMDP instance  $M = (\mathcal{S}, \mathcal{A}, P, r, \gamma) \in \mathcal{M}_K^{trans}(\mathcal{S}, \mathcal{A}, \gamma)$  with a feature representation  $\phi$ . We pick  $\mathcal{S}$  and  $\mathcal{S}'$  to be supersets of  $\mathcal{S}$  and  $\mathcal{A}'$  respectively, so that the transition distributions and rewards remain unchanged on  $\mathcal{S}' \times \mathcal{A}'$ , i.e.,  $P(\cdot | s, a) = P'(\cdot | s, a)$  and  $r(s, a) = r'(s, a)$  for  $s \in \mathcal{S}', a \in \mathcal{A}'$ . From  $(s, a) \in (\mathcal{S} \times \mathcal{A}) / (\mathcal{S}' \times \mathcal{A}')$ , the process transitions to an absorbing state  $s^0 \in \mathcal{S} / \mathcal{S}'$  with probability 1 and stays there with reward 0.

Now we show that  $M$  admits a feature representation  $\phi : \mathcal{S} \times \mathcal{A} \rightarrow \mathbb{R}^K$  as follows. Say  $(s, a)$  is the  $k$ -th element in  $\mathcal{S}' \times \mathcal{A}$ , we let  $\phi(s, a) = \mathbf{1}_k$ , which is the unit vector whose  $k$ th entry equals one. For  $(s, a) \notin \mathcal{S}' \times \mathcal{A}$ , we let  $\phi(s, a) = \mathbf{1}_K$ . Then we can verify that  $P(s' | s, a) = \sum_{k \in [K]} \phi_k(s, a) \psi_k(s')$  for some  $\psi_k$ 's. Thus we have constructed an MDP instance  $M' \in \mathcal{M}_K^{trans}(\mathcal{S}, \mathcal{A}, \gamma)$  with feature representation  $\phi$ .

Suppose that  $\mathcal{K}$  is an algorithm that applies to  $M$  using  $N$  samples. Based on the reduction, we immediately obtained an algorithm  $\mathcal{K}'$  that applies to  $M'$  using  $N$  samples and the feature map  $\phi$ :  $\mathcal{K}'$  works by applying  $\mathcal{K}$  to  $M$  and outputs the restricted policy on  $\mathcal{S}' \times \mathcal{A}'$ . It can be easily verified that if  $\pi$  is an  $\epsilon$ -optimal policy for  $M$  then the reduction gives an  $\epsilon$ -optimal policy for  $M'$ . By virtue of the reduction, one gets

$$\begin{aligned} \inf_{\mathcal{K}} \sup_{M \in \mathcal{M}_K^{trans}(\mathcal{S}, \mathcal{A}, \gamma)} \mathbb{P} \left( \sup_{s \in \mathcal{S}} (v^*(s) - v^{\pi^{\mathcal{K}, M, N}}(s)) \geq \epsilon \right) &\geq \inf_{\mathcal{K}'} \sup_{M' \in \mathcal{M}'} \mathbb{P} \left( \sup_{s \in \mathcal{S}} (v^{*, M'}(s) - v^{\pi^{\mathcal{K}', M', N}}(s)) \geq \epsilon \right) \\ &\geq 1/3, \end{aligned}$$

This completes the proof.  $\square$

### C. Proof of Theorem 2.

*Proof.* Recall that  $P_{\mathcal{K}}$  is a submatrix of  $P$  formed by the rows indexed by  $\mathcal{K}$ . We denote  $\tilde{P}_{\mathcal{K}}$  in the same manner for  $\tilde{P}$ . Recall that  $\|P - \tilde{P}\|_{1, \infty} \leq \xi$ . Let  $\hat{P}_{\mathcal{K}}^{(t)}$  be the matrix of empirical transition probabilities based on  $m := N/(KR)$  sample transitions per  $(s, a) \in \mathcal{K}$  generated at iteration  $t$ . It can be viewed as an estimate of  $P_{\mathcal{K}}$  at iteration  $t$ . Since  $\tilde{P}$  admits a context representation, it can be written as

$$\tilde{P} = \Phi \Psi \quad \text{where} \quad \Psi = \Phi_{\mathcal{K}}^{-1} \tilde{P}_{\mathcal{K}}.$$

Let  $\hat{\Psi}^{(t)} = \Phi_{\mathcal{K}}^{-1} \hat{P}_{\mathcal{K}}^{(t)}$  be the estimate of  $\Psi$  at iteration  $t$ . We can view  $\Phi \hat{\Psi}^{(t)}$  as an estimate of  $P$ .

We will show that each iteration of the algorithm is an approximate value iteration. We first define the approximate Bellman operator,  $\hat{\mathcal{T}}$  as,  $\forall v \in \mathbb{R}^{\mathcal{S}}$ :

$$[\hat{\mathcal{T}}^{(t)} v](s) = \max_a \left[ r(s, a) + \gamma \phi(s, a)^\top \Phi_{\mathcal{K}}^{-1} \hat{P}_{\mathcal{K}}^{(t)} v \right].$$

Notice that, by definition of the algorithm,

$$V_{w^{(t)}} \leftarrow \hat{\mathcal{T}}^{(t)} \Pi_{[0, H]} [V_{w^{(t-1)}}],$$

where  $w^{(0)} = 0 \in \mathbb{R}^K$  and  $w^{(t)}$  is the  $w$  at the end of the  $t$ -th iteration of the algorithm and  $H = (1 - \gamma)^{-1}$  and  $\Pi_{[0, H]}(\cdot)$  denotes entrywise projection to  $[0, H]$ . For the rest of the proof, we denote

$$\hat{V}_{w^{(t-1)}} = \Pi_{[0, H]} [V_{w^{(t-1)}}].$$

We now show the approximation quality of  $\hat{\mathcal{T}}$ , i.e., estimate  $\|\hat{\mathcal{T}}^{(t)} \hat{V}_{w^{(t-1)}} - \mathcal{T} \hat{V}_{w^{(t-1)}}\|_{\infty}$ , where  $\mathcal{T}$  is the exact Bellman operator. Notice that

$$\forall s : \quad |[\hat{\mathcal{T}}^{(t)} \hat{V}_{w^{(t-1)}}](s) - [\mathcal{T} \hat{V}_{w^{(t-1)}}](s)| \leq \gamma \max_a |\phi(s, a)^\top \Phi_{\mathcal{K}}^{-1} \hat{P}_{\mathcal{K}}^{(t)} \hat{V}_{w^{(t-1)}} - P(\cdot | s, a)^\top \hat{V}_{w^{(t-1)}}|.$$

It remains to show the right hand side of the above inequality is small.

Denote  $\mathcal{F}_t$  to be the filtration defined by the samples up to iteration  $t$ . Then, by the Hoeffding inequality and the fact that the samples at iteration  $t$  are independent with that from iteration  $t - 1$ , we have

$$\Pr \left[ \|\hat{P}_{\mathcal{K}}^{(t)} \hat{V}_{w^{(t-1)}} - P_{\mathcal{K}} \hat{V}_{w^{(t-1)}}\|_{\infty} \leq \epsilon_1 \mid \mathcal{F}_{t-1} \right] \geq 1 - \delta/R$$

where we denote

$$\epsilon_1 = cH \cdot \sqrt{\frac{\log(KR\delta^{-1})}{m}}$$

for some generic constant  $c$ . Next, let  $\mathcal{E}_t$  be the event that,

$$\|\widehat{P}_{\mathcal{K}}^{(t)}\widehat{V}_{w^{(t-1)}} - P_{\mathcal{K}}\widehat{V}_{w^{(t-1)}}\|_{\infty} \leq \epsilon_1.$$

We thus have  $\Pr[\mathcal{E}_t | \mathcal{F}_{t-1}] \geq 1 - \delta/R$  and  $\Pr[\mathcal{E}_t | \mathcal{E}_1, \mathcal{E}_2, \dots, \mathcal{E}_{t-1}] \geq 1 - \delta/R$  since  $\mathcal{E}_1, \mathcal{E}_2, \dots, \mathcal{E}_{t-1}$  are adapted to  $\mathcal{F}_{t-1}$ . This lead to

$$\Pr[\mathcal{E}_1 \cap \mathcal{E}_2 \cap \dots \cap \mathcal{E}_R] = \Pr[\mathcal{E}_1] \Pr[\mathcal{E}_2 | \mathcal{E}_1] \dots \geq 1 - \delta.$$

Now we consider event  $\mathcal{E} := \mathcal{E}_1 \cap \mathcal{E}_2 \cap \dots \cap \mathcal{E}_R$ , on which we have, for all  $t \in [R]$ ,

$$|\phi(s, a)^{\top} \Phi_{\mathcal{K}}^{-1} \widehat{P}_{\mathcal{K}}^{(t)} \widehat{V}_{w^{(t-1)}} - \phi(s, a)^{\top} \Phi_{\mathcal{K}}^{-1} P_{\mathcal{K}} \widehat{V}_{w^{(t-1)}}| \leq \|\phi(s, a)^{\top} \Phi_{\mathcal{K}}^{-1}\|_1 \cdot \epsilon_1 \leq L\epsilon_1.$$

Note that,  $\|P_{\mathcal{K}} - \widetilde{P}_{\mathcal{K}}\|_{1, \infty} \leq \xi$ , we thus have

$$|\phi(s, a)^{\top} \Phi_{\mathcal{K}}^{-1} \widehat{P}_{\mathcal{K}}^{(t)} \widehat{V}_{w^{(t-1)}} - \phi(s, a)^{\top} \Phi_{\mathcal{K}}^{-1} \widetilde{P}_{\mathcal{K}} \widehat{V}_{w^{(t-1)}}| \leq L\epsilon_1 + |\phi(s, a)^{\top} \Phi_{\mathcal{K}}^{-1} (P_{\mathcal{K}} - \widetilde{P}_{\mathcal{K}}) \widehat{V}_{w^{(t-1)}}| \leq L\epsilon_1 + LH\xi,$$

Further using

$$|(\phi(s, a)^{\top} \Phi_{\mathcal{K}}^{-1} \widetilde{P}_{\mathcal{K}}^{(t)} - P(\cdot | s, a)^{\top}) \widehat{V}_{w^{(t-1)}}| \leq H\xi,$$

we thus have

$$\begin{aligned} |\phi(s, a)^{\top} \Phi_{\mathcal{K}}^{-1} \widehat{P}_{\mathcal{K}}^{(t)} \widehat{V}_{w^{(t-1)}} - P(\cdot | s, a)^{\top} \widehat{V}_{w^{(t-1)}}| &\leq |\phi(s, a)^{\top} (\Phi_{\mathcal{K}}^{-1} \widehat{P}_{\mathcal{K}}^{(t)} - \Phi_{\mathcal{K}}^{-1} \widetilde{P}_{\mathcal{K}}^{(t)} + \Phi_{\mathcal{K}}^{-1} \widetilde{P}_{\mathcal{K}}^{(t)}) \widehat{V}_{w^{(t-1)}} \\ &\quad - P(\cdot | s, a)^{\top} \widehat{V}_{w^{(t-1)}}| \\ &\leq L\epsilon_1 + LH\xi + H\xi. \end{aligned}$$

Further notice that  $\Pi_{[0, H]}$  can only makes error smaller. Therefore, we have shown that the  $\widehat{V}_{w^{(t)}}$ s follow an approximate value iteration with error  $\gamma[L\epsilon_1 + (L+1)H\xi]$  with probability at least  $1 - \delta$ . Because of the contraction of the operator  $\mathcal{T}$ , we have, after  $R$  iterations,

$$\|\widehat{V}_{w^{(R-1)}} - v^*\|_{\infty} \leq \gamma^{R-1}H + \gamma R[L\epsilon_1 + (L+1)H\xi] \leq \gamma R[2L\epsilon_1 + (L+1)H\xi]$$

for appropriately chosen  $R = \Theta(\log(NH)/(1-\gamma))$ . Since  $Q_{w^{(R)}}(s, a) = r(s, a) + \gamma\phi(s, a)^{\top} \Phi_{\mathcal{K}}^{-1} \widehat{P}_{\mathcal{K}}^{(R)} \widehat{V}_{w^{(R-1)}}$ , we have,

$$\|Q_{w^{(R)}} - Q^*\|_{\infty} \leq 2\gamma R[2L\epsilon_1 + (L+1)H\xi]$$

happens with probability at least  $1 - \delta$ . It follows that (see, e.g., Proposition 2.1.4 of (Bertsekas, 2005)),

$$\|v^{\pi_{w^{(R)}}} - v^*\|_{\infty} \leq 2\gamma RH[2L\epsilon_1 + (L+1)H\xi],$$

with probability at least  $1 - \delta$ . Plugging the values of  $H$ ,  $\epsilon_1$  and  $m$ , we have

$$\|v^{\pi_{w^{(R)}}} - v^*\|_{\infty} \leq C\gamma \cdot \frac{\log(NH)}{1-\gamma} \cdot \frac{1}{1-\gamma} \cdot L \cdot \sqrt{\frac{K \log(KR\delta^{-1})}{(1-\gamma)^2 \cdot N} \cdot \frac{\log(NH)}{1-\gamma}} + C\gamma \cdot \frac{\log(NH)}{1-\gamma} \cdot \frac{L}{(1-\gamma)^2} \cdot \xi$$

for some generic constant  $C > 0$ . This completes the proof.  $\square$

## D. Proof of Theorem 3

According to the discussions following Assumption 2, we assume without loss of generality:

- For each anchor  $(s_k, a_k) \in \mathcal{K}$ ,  $\phi(s_k, a_k)$  is a vector with  $\ell_1$ -norm 1.

Then Assumption 2 further implies

- $\phi(s, a)$  is a vector of probabilities for all  $(s, a)$ .
- For each  $(s, a)$ ,  $P(\cdot | s, a) = \sum_k \phi_k(s, a) P(\cdot | s_k, a_k)$ .

### D.1. Notations

**$\mathcal{T}$ -operator** For any value function  $V : \mathcal{S} \rightarrow \mathbb{R}$  and policy  $\pi : \mathcal{S} \rightarrow \mathcal{A}$ , we denote the Bellman operators as

$$\mathcal{T}V[s] = \max_{a \in \mathcal{A}} [r(s, a) + \gamma P(\cdot | s, a)^\top V] \quad \text{and} \quad \mathcal{T}_\pi V[s] = r(s, \pi(s)) + \gamma P(\cdot | s, \pi(s))^\top V$$

The key properties, e.g. monotonicity and contraction, of the  $\mathcal{T}$ -operator can be found in Puterman (2014). For completeness, we state them here.

**Fact 4** (Bellman Operator). *For any value function  $V, V' : \mathcal{S} \rightarrow \mathbb{R}$ , if  $V \leq V'$  entry-wisely, we then have,*

$$\begin{aligned} \mathcal{T}V &\leq \mathcal{T}V' \quad \text{and} \quad \mathcal{T}_\pi V \leq \mathcal{T}_\pi V', \\ \|\mathcal{T}V - v^*\|_\infty &\leq \gamma \|V - v^*\|_\infty \quad \text{and} \quad \|\mathcal{T}_\pi V - v^\pi\|_\infty \leq \gamma \|V - v^\pi\|_\infty, \\ \lim_{t \rightarrow \infty} \mathcal{T}^t V &= v^* \quad \text{and} \quad \lim_{t \rightarrow \infty} \mathcal{T}_\pi^t V = v^\pi. \end{aligned}$$

**$Q$ -function** We let, for any  $(s, a)$ ,

$$\begin{aligned} Q_{\theta^{(i,j)}}(s, a) &= r(s, a) + \gamma \phi(s, a)^\top \bar{w}^{(i,j)}, \\ \bar{Q}_{\theta^{(i,j)}}(s, a) &= r(s, a) + \gamma P(\cdot | s, a)^\top V_{\theta^{(i,j-1)}}(\cdot). \end{aligned}$$

**Variance of value function** For  $(s, a)$ , we denote the variance of a function (or a vector)  $V : \mathcal{S} \rightarrow \mathbb{R}$  as,

$$\sigma_{s,a}[V] := \sum_{s'} P(s' | s, a) V^2(s') - \left( \sum_{s'} P(s' | s, a) V(s') \right)^2,$$

we also denote  $\sigma_k(\cdot) = \sigma_{s_k, a_k}(\cdot)$  for  $(s_k, a_k) \in \mathcal{K}$ .

**$\mathcal{E}$ -event** In Algorithm 2, let  $\mathcal{E}^{(i,0)}$  be the event that

$$\forall k \in [K] : |w^{(i,0)}(k) - P(\cdot | s_k, a_k)^\top V_{\theta^{(i,0)}}| \leq \epsilon^{(i,0)}(k) \leq C \left[ \sqrt{\frac{\log(R'RK\delta^{-1})\sigma_k[V_{\theta^{(i,0)}}]}{m}} + \frac{\log(R'RK\delta^{-1})}{(1-\gamma)m^{3/4}} \right]$$

for some generic constant  $C > 0$ . Let  $\mathcal{E}^{(i,j)}$  be the event on which

$$\forall k \in [K] : |w^{(i,j)}(k) - w^{(i,0)}(k) - P(\cdot | s_k, a_k)^\top (V_{\theta^{(i,j-1)}} - V_{\theta^{(i,0)}})| \leq C(1-\gamma)^{-1}2^{-i}\sqrt{\log(R'RK\delta^{-1})/m_1},$$

where  $R', R, m, m_1$  are parameters defined in Algorithm 2.

**$\mathcal{G}$ -event** Let  $\mathcal{G}^{(i)}$  be the event such that

$$0 \leq V_{\theta^{(i,0)}}(s) \leq \mathcal{T}_{\pi_{\theta^{(i,0)}}} V_{\theta^{(i,0)}}[s] \leq v^*(s), \quad v^*(s) - V_{\theta^{(i,0)}}(s) \leq c2^{-i}/(1-\gamma), \quad \forall s \in \mathcal{S},$$

for some sufficiently small constant  $c$ .

### D.2. Some Properties

Firstly we notice that the parameterized functions  $Q_\theta, V_\theta$  (eq. (5)) increase pointwisely (as index  $(i, j)$  increases).

**Lemma 5** (Monotonicity of the Parametrized  $V$ ). *For every  $(i, j), (i', j') \in [R'] \times [R]$ , and  $s \in \mathcal{S}$ , if  $(i, j) \leq (i', j')$  (in lexical order), we have*

$$V_{\theta^{(i,j)}}(s) \leq V_{\theta^{(i',j')}}(s).$$

We note the triangle inequality of variance.

**Lemma 6.** *For any  $V_1, V_2 : \mathcal{S} \rightarrow \mathbb{R}$ , we have  $\sqrt{\sigma_k[V_1 + V_2]} \leq \sqrt{\sigma_k[V_1]} + \sqrt{\sigma_k[V_2]}$  for all  $k \in [K]$ .*

The next is a key lemma showing a property of the convex combination of the standard deviations, which relies on the anchor condition.

**Lemma 7.** For any  $V : \mathcal{S} \rightarrow \mathbb{R}$  and  $s, a \in \mathcal{S} \times \mathcal{A}$ :

$$\sum_{k \in [K]} \phi_k(s, a) \sqrt{\sigma_k[V]} \leq \sqrt{\sigma_{s,a}(V)}.$$

*Proof.* Since  $[\phi_1(s, a), \dots, \phi_K(s, a)]$  is a vector of probability distribution (due to Assumption 2 without loss of generality), by Jensen's inequality we have,

$$\begin{aligned} \sum_k \phi_k(s, a) \sqrt{\sigma_k[V]} &\leq \sqrt{\sum_k \phi_k(s, a) \sigma_k[V]} = \sqrt{\sum_k \phi_k(s, a) \left[ \sum_{s'} P(s'|s_k, a_k) V^2(s') - \left( \sum_{s'} P(s'|s_k, a_k) V(s') \right)^2 \right]} \\ &= \sqrt{\sum_{s'} P(s'|s, a) V^2(s') - \sum_k \phi_k(s, a) \left[ \left( \sum_{s'} P(s'|s_k, a_k) V(s') \right)^2 \right]}. \end{aligned}$$

By the Jensen's inequality again, we have

$$\sum_k \phi_k(s, a) \left( \sum_{s'} P(s'|s_k, a_k) V(s') \right)^2 \geq \left( \sum_k \phi_k(s, a) \sum_{s'} P(s'|s_k, a_k) V(s') \right)^2 = \left( \sum_{s'} P(s'|s, a) V(s') \right)^2.$$

Combining the above two equations, we complete the proof.  $\square$

### D.3. Monotonicity Preservation

The next lemma illustrates, conditioning on  $\mathcal{E}^{(i,j)}$  and  $\mathcal{G}^{(i)}$ , a monotonicity property is preserved throughout the inner loop.

**Lemma 8** (Preservation of Monotonicity Property). *Conditioning on the events  $\mathcal{G}^{(i)}$ ,  $\mathcal{E}^{(i,0)}$ ,  $\mathcal{E}^{(i,1)}$ ,  $\dots$ ,  $\mathcal{E}^{(i,j)}$ , we have for all  $s \in \mathcal{S}$ ,  $j' \in [0, j]$ ,*

$$V_{\theta^{(i,j')}}(s) \leq \mathcal{T}_{\pi_{\theta^{(i,j')}}} V_{\theta^{(i,j')}}[s] \leq \mathcal{T}V_{\theta^{(i,j')}}[s] \leq v^*(s). \quad (6)$$

Moreover, for any fixed policy  $\pi^*$ , we have, for  $j' \in [j]$ ,

$$v^*(s) - V_{\theta^{(i,j')}}(s) \leq \gamma P(\cdot|s, \pi^*(s))^\top (v^* - V_{\theta^{(i,j'-1)}}) + 2\gamma \sum_k \phi_k(s, \pi^*(s)) \epsilon^{(i,j')}(k). \quad (7)$$

*Proof.*

**Proof of (6) by Induction:** We first prove the inequalities in (6) by induction on  $j'$ . The base case of  $j' = 0$  holds by definition of  $\mathcal{G}^{(i)}$ .

Now assuming it holds for  $j' - 1 \geq 0$ , let us verify that (6) holds for  $j'$ . For any  $s \in \mathcal{S}$ , we rewrite the corresponding value function defined in (5) as follows:

$$V_{\theta^{(i,j')}}(s) = \max_a \left\{ \max_a Q_{\theta^{(i,j')}}(s, a), V_{\theta^{(i,j'-1)}}(s) \right\}.$$

For any  $s \in \mathcal{S}$ , there are only two cases to make the above equation hold:

1.  $V_{\theta^{(i,j')}}(s) = V_{\theta^{(i,j'-1)}}(s) \Rightarrow \max_a Q_{\theta^{(i,j')}}(s, a) < V_{\theta^{(i,j'-1)}}(s)$  and  $\pi_{\theta^{(i,j')}}(s) = \pi_{\theta^{(i,j'-1)}}(s)$ ;
2.  $V_{\theta^{(i,j')}}(s) = \max_a Q_{\theta^{(i,j')}}(s, a) \Rightarrow \max_a Q_{\theta^{(i,j')}}(s, a) \geq V_{\theta^{(i,j'-1)}}(s)$  and  $\pi_{\theta^{(i,j')}}(s) = \arg \max_a Q_{\theta^{(i,j')}}(s, a)$ .

We investigate the consequences of case 1. Since (6) holds for  $j' - 1$ , we have  $V_{\theta^{(i,j')}}(s) = V_{\theta^{(i,j'-1)}}(s) \leq v^*(s)$ . Moreover, since (6) holds for  $j' - 1$  and  $\pi_{\theta^{(i,j')}}(s) = \pi_{\theta^{(i,j'-1)}}(s)$ , we have

$$\begin{aligned} V_{\theta^{(i,j')}}(s) &= V_{\theta^{(i,j'-1)}}(s) \leq \mathcal{T}_{\pi_{\theta^{(i,j')}}} V_{\theta^{(i,j'-1)}}[s] && \triangleright \text{by induction hypothesis} \\ &\leq \mathcal{T}_{\pi_{\theta^{(i,j')}}} V_{\theta^{(i,j')}}[s] && \triangleright \text{by Lemma 5 and the monotonicity of } \mathcal{T}_\pi \\ &\leq \mathcal{T}V_{\theta^{(i,j')}}[s]. \end{aligned}$$

We now investigate the consequences of case 2. Notice that conditioning on  $\mathcal{E}^{(i,0)}, \mathcal{E}^{(i,1)} \dots, \mathcal{E}^{(i,j')}$  (by specifying the constant  $C$  appropriately), we can verify that,

$$\forall k \in [K] : \bar{w}^{(i,j')}(k) := \Pi_{[0,H]}(w^{(i,j')}(k) - \epsilon^{(i,j')}(k)) \leq P(\cdot | s_k, a_k)^\top V_{\theta^{(i,j'-1)}},$$

where  $H = (1 - \gamma)^{-1}$ . Thus, for any  $a \in \mathcal{A}$ ,

$$Q_{\theta^{(i,j')}}(s, a) = r(s, a) + \gamma \phi(s, a)^\top \bar{w}^{(i,j')} \leq r(s, a) + \gamma \sum_{k \in [K]} \phi_k(s, a) P(\cdot | s_k, a_k)^\top V_{\theta^{(i,j'-1)}} = \bar{Q}_{\theta^{(i,j')}}(s, a).$$

Then we have

$$\begin{aligned} 0 &\leq \max_a Q_{\theta^{(i,j')}}(s, a) = Q_{\theta^{(i,j')}}(s, \pi_{\theta^{(i,j')}}(s)); \\ \max_a Q_{\theta^{(i,j')}}(s, a) &\leq \bar{Q}_{\theta^{(i,j')}}(s, \pi_{\theta^{(i,j')}}(s)) = \mathcal{T}_{\pi_{\theta^{(i,j')}}} V_{\theta^{(i,j'-1)}}[s]; \\ \max_a Q_{\theta^{(i,j')}}(s, a) &\leq \max_a \bar{Q}_{\theta^{(i,j'-1)}}(s, a) = \mathcal{T} V_{\theta^{(i,j'-1)}}[s]. \end{aligned} \quad (8)$$

As a result, we obtain

$$\begin{aligned} 0 &\leq V_{\theta^{(i,j')}}(s) = \max_a Q_{\theta^{(i,j')}}(s, a) \leq \mathcal{T}_{\pi_{\theta^{(i,j')}}(s)} V_{\theta^{(i,j'-1)}}[s] \\ &\leq \mathcal{T}_{\pi_{\theta^{(i,j')}}} V_{\theta^{(i,j'-1)}}[s] \quad \triangleright \text{by Lemma 5 and the monotonicity of } \mathcal{T}_\pi \\ &\leq \mathcal{T} V_{\theta^{(i,j'-1)}}[s]. \end{aligned}$$

We see that  $0 \leq V_{\theta^{(i,j')}}(s) \leq \mathcal{T}_{\pi_{\theta^{(i,j')}}} V_{\theta^{(i,j'-1)}}[s] \leq \mathcal{T} V_{\theta^{(i,j'-1)}}[s]$  holds in both cases 1 and 2. Also note that since (6) holds for  $j' - 1$ , we have  $V_{\theta^{(i,j'-1)}} \leq v^*$ . It follows from the monotonicity of the Bellman operator that

$$0 \leq V_{\theta^{(i,j')}}(s) \leq \mathcal{T}_{\pi_{\theta^{(i,j')}}} V_{\theta^{(i,j'-1)}}[s] \leq \mathcal{T}_{\pi_{\theta^{(i,j')}}} v^*[s] \leq v^*(s).$$

This completes the induction.

**Proof of (7):** Let  $\pi^*$  be some fixed optimal policy. For each  $j' \in [j]$ , by (5), we have

$$V_{\theta^{(i,j')}}(s) \geq \max_{a \in \mathcal{A}} Q_{\theta^{(i,j')}}(s, a) := \max_{a \in \mathcal{A}} [r(s, a) + \gamma \phi(s, a)^\top \bar{w}^{(i,j')}].$$

By definition of  $\mathcal{E}^{(i,j')}$ , we have

$$\forall k \in [K] : \bar{w}^{(i,j')}(k) \geq w^{(i,j')}(k) - \epsilon^{(i,j')}(k) \geq P(\cdot | s_k, a_k)^\top V_{\theta^{(i,j'-1)}} - 2\epsilon^{(i,j')}(k).$$

Therefore,

$$V_{\theta^{(i,j')}}(s) \geq \max_a \left[ r(s, a) + \gamma \sum_k \phi_k(s, a) (P(\cdot | s_k, a_k)^\top V_{\theta^{(i,j'-1)}} - 2\epsilon^{(i,j')}(k)) \right].$$

Hence,

$$\begin{aligned} v^*(s) - V_{\theta^{(i,j')}}(s) &\leq r^{\pi^*}(s) + \gamma P^{\pi^*}(\cdot | s)^\top v^* - \max_a \left[ r(s, a) + \gamma \sum_k \phi_k(s, a) (P(\cdot | s_k, a_k)^\top V_{\theta^{(i,j'-1)}} - 2\epsilon^{(i,j')}(k)) \right] \\ &\leq r^{\pi^*}(s) + \gamma P^{\pi^*}(\cdot | s)^\top v^* - \left[ r(s, \pi^*(s)) + \gamma \sum_k \phi_k(s, \pi^*(s)) (P(\cdot | s_k, a_k)^\top V_{\theta^{(i,j'-1)}} - 2\epsilon^{(i,j')}(k)) \right] \\ &= \gamma P^{\pi^*}(\cdot | s)^\top (v^* - V_{\theta^{(i,j'-1)}}) + 2\gamma \sum_k \phi_k(s, \pi^*(s)) \epsilon^{(i,j')}(k), \end{aligned}$$

where  $P^{\pi^*}(\cdot | s) = P(\cdot | s, \pi^*(s))$  and we use the fact that  $P^{\pi^*}(\cdot | s) = \sum_k \phi_k(s, \pi^*(s)) P(\cdot | s_k, a_k)$  in the last equality.  $\square$

#### D.4. Accuracy of Confidence Bounds

We show that the mini-batch sample sizes picked in Algorithm 2 are sufficient to control the error occurred in the inner-loop iterations, such that the events  $\mathcal{E}^{(i,0)}, \mathcal{E}^{(i,1)}, \dots, \mathcal{E}^{(i,R')}$  jointly happen with close-to-1 probability.

**Lemma 9.** For  $i = 0, 1, 2, \dots, R'$ ,

$$\Pr[\mathcal{E}^{(i,0)}, \mathcal{E}^{(i,1)}, \dots, \mathcal{E}^{(i,R')} | \mathcal{G}^{(i)}] \geq 1 - \delta/R'.$$

*Proof.* We analyze each event separately.

**Probability of  $\mathcal{E}^{(i,0)}$ :** We first show that  $\Pr[\mathcal{E}^{(i,0)} | \mathcal{G}^{(i)}] \geq 1 - \delta/(RR')$ . Note that  $V_{\theta^{(i,0)}}(s) \in [0, \frac{1}{1-\gamma}]$  is determined by the samples obtained before the outer-iteration  $i$  starts, therefore samples obtained in iteration  $(i, j)$  for  $j \geq 0$  are independent with  $V_{\theta^{(i,0)}}$ . Hence, conditioning on  $\mathcal{G}^{(i)}$ , for a fixed  $\delta \in (0, 1)$  and  $k \in [K]$ , by the Bernstein's and the Hoeffding's inequalities, for some constant  $c_1 > 0$ , the following two inequalities hold with probability at least  $1 - \delta$ ,

$$\begin{aligned} \left| w^{(i,0)}(k) - P(\cdot | s_k, a_k)^\top V_{\theta^{(i,0)}} \right| &\leq \min \left\{ c_1 \sqrt{\frac{\log[\delta^{-1}] \sigma_k[V_{\theta^{(i,0)}]}]}{m}} + \frac{c_1 \log \delta^{-1}}{(1-\gamma)m}, \quad c_1(1-\gamma)^{-1} \cdot \sqrt{\frac{\log[\delta^{-1}]}{m}} \right\} \\ \left| z^{(i,0)}(k) - P(\cdot | s_k, a_k)^\top V_{\theta^{(i,0)}}^2 \right| &\leq c_1(1-\gamma)^{-2} \cdot \sqrt{\frac{\log[\delta^{-1}]}{m}}, \end{aligned}$$

where we recall the notation  $\sigma_k[V_{\theta^{(i,0)}}] = P(\cdot | s_k, a_k)^\top V_{\theta^{(i,0)}}^2 - [P(\cdot | s_k, a_k)^\top V_{\theta^{(i,0)}}]^2 \leq (1-\gamma)^{-2}$  (see D.1). Conditioning on the preceding two inequalities, we have

$$\left| \sigma_k[V_{\theta^{(i,0)}}] - \sigma^{(i,0)}(k) \right| = \left| \sigma_k[V_{\theta^{(i,0)}}] - \left( z^{(i,0)}(k) - w^{(i,0)}(k)^2 \right) \right| \leq c'_1(1-\gamma)^{-2} \cdot \sqrt{\frac{\log[\delta^{-1}]}{m}}$$

for some constant  $c'_1$ , where  $\sigma^{(i,0)}(k) := z^{(i,0)}(k) - (w^{(i,0)}(k))^2$  according to tep 13 of Alg. 2. Thus,  $\sigma_k[V_{\theta^{(i,0)}}] \leq \sigma^{(i,0)}(k) + c'_1(1-\gamma)^{-2} \cdot \sqrt{\frac{\log[\delta^{-1}]}{m}}$ . We further obtain,

$$\sqrt{\sigma^{(i,0)}(k) + c'_1(1-\gamma)^{-2} \cdot \sqrt{\frac{\log[\delta^{-1}]}{m}}} \leq \sqrt{\sigma^{(i,0)}(k)} + \left( c_1'^2(1-\gamma)^{-4} \frac{\log[\delta^{-1}]}{m} \right)^{1/4}.$$

By plugging in  $\delta \leftarrow \delta/(KR'R)$ , we have,

$$\begin{aligned} \left| w^{(i,0)}(k) - P(\cdot | s_k, a_k)^\top V_{\theta^{(i,0)}} \right| &\leq c_1 \sqrt{\frac{\log[KRR'\delta^{-1}] \sigma_k[V_{\theta^{(i,0)}]}]}{m}} + \frac{c_1 \log(KRR'\delta^{-1})}{(1-\gamma)m} \\ &\leq \Theta \left[ \sqrt{\frac{\log[R'RK\delta^{-1}] \cdot \sigma^{(i,0)}(k)}{m}} + \frac{\log[R'RK\delta^{-1}]}{(1-\gamma)m^{3/4}} \right] \\ &= \epsilon^{(i,0)}(k) \end{aligned}$$

with probability at least  $1 - \delta/(KR'R)$ , where  $\epsilon^{(i,0)}(k)$  is defined in Step 13 of Algorithm 2. Since  $\sigma^{(i,0)}(k) \leq \sigma_k[V_{\theta^{(i,0)}}] + c'_1(1-\gamma)^{-2} \cdot \sqrt{\frac{\log[\delta^{-1}]}{m}}$ , we further have

$$\epsilon^{(i,0)}(k) \leq \Theta \left[ \sqrt{\log(RR'K\delta^{-1}) \sigma_k[V_{\theta^{(i,0)}]}/m} + \left( (1-\gamma)^{-4} \frac{\log[RR'K\delta^{-1}]^4}{m^3} \right)^{1/4} \right].$$

Therefore, by applying an union bound over all  $k \in [K]$ , we have

$$\Pr[\mathcal{E}^{(i,0)} | \mathcal{G}^{(i)}] \geq 1 - \delta/(RR').$$

Reminder that if  $\mathcal{E}^{(i,0)}$  happens, then  $w^{(i,0)} - \epsilon^{(i,0)} \leq P(\cdot | s_k, a_k)^\top V_{\theta^{(i,0)}}$ .

**Probability of  $\mathcal{E}^{(i,j)}$  by Induction:** We now prove by induction that

$$\Pr[\mathcal{E}^{(i,j)} | \mathcal{E}^{(i,j-1)}, \mathcal{E}^{(i,j-2)}, \dots, \mathcal{E}^{(i,0)}, \mathcal{F}^{(i)}] \geq 1 - \delta / (RR'). \quad (9)$$

For the base case  $j = 1$ , we have

$$w^{(i,1)} = w^{(i,0)} \quad \text{and} \quad \epsilon^{(i,1)} = \epsilon^{(i,0)} + \Theta(1 - \gamma)^{-1} 2^{-i} \sqrt{\log(RR'K/\delta)},$$

therefore  $\Pr[\mathcal{E}^{(i,1)} | \mathcal{E}^{(i,0)}, \mathcal{G}^{(i)}] = 1$ . Now consider  $j$ . Conditioning on  $\mathcal{E}^{(i,j-1)}, \mathcal{E}^{(i,j-2)}, \dots, \mathcal{E}^{(i,0)}, \mathcal{F}^{(i)}$ , we have with probability at least  $1 - \delta$ ,

$$\begin{aligned} & \left| \frac{1}{m_1} \sum_{\ell=1}^{m_1} \left( V_{\theta^{(i,j-1)}}(x_k^{(\ell)}) - V_{\theta^{(i,0)}}(x_k^{(\ell)}) \right) - P(\cdot | s_k, a_k)^\top \left( V_{\theta^{(i,j-1)}} - V_{\theta^{(i,0)}} \right) \right| \\ & \leq c_2 \max_s |V_{\theta^{(i,j-1)}}(s) - V_{\theta^{(i,0)}}(s)| \cdot \sqrt{\frac{\log(\delta^{-1})}{m_1}} \\ & \leq c_2 \max_s |v^*(s) - V_{\theta^{(i,0)}}(s)| \cdot \sqrt{\log(\delta^{-1})/m_1} \quad \triangleright V_{\theta^{(i,0)}} \leq V_{\theta^{(i,j-1)}} \leq v^* \\ & \leq c_2 2^{-i} (1 - \gamma)^{-1} \cdot \sqrt{\log(\delta^{-1})/m_1}. \quad \triangleright \text{By definition of } \mathcal{G}^{(i)} \end{aligned}$$

Letting  $\delta \leftarrow \delta / (RR'K)$  and applying a union bound over  $k \in [K]$ , we obtain (9).

**Probability of Joint Events:** Finally, we have that

$$\begin{aligned} \Pr[\mathcal{E}^{(i,0)} \cap \mathcal{E}^{(i,1)} \dots \cap \mathcal{E}^{(i,R)} | \mathcal{G}^{(i)}] &= \Pr[\mathcal{E}^{(i,0)} | \mathcal{G}^{(i)}] \Pr[\mathcal{E}^{(i,1)} | \mathcal{E}^{(i,0)}, \mathcal{G}^{(i)}] \dots \Pr[\mathcal{E}^{(i,R)} | \mathcal{E}^{(i,0)}, \mathcal{E}^{(i,1)}, \dots, \mathcal{E}^{(i,R-1)}, \mathcal{G}^{(i)}] \\ &\geq 1 - \delta / R'. \end{aligned}$$

□

**Lemma 10** (Upper Bound of  $\epsilon^{(i,j)}(k)$ ). *Conditioning on the events  $\mathcal{F}^{(i)}, \mathcal{E}^{(i,0)}, \mathcal{E}^{(i,1)}, \dots, \mathcal{E}^{(i,j)}$ , we have, for all  $k \in [K]$*

$$\epsilon^{(i,j)}(k) \leq C \left[ \sqrt{\frac{\log(R'RK\delta^{-1})\sigma_k[v^*]}{m}} + \frac{\log(R'RK\delta^{-1})}{(1 - \gamma)m^{3/4}} + 2^{-i} \sqrt{\frac{\log(R'RK\delta^{-1})}{(1 - \gamma)^2 m_1}} \right]$$

for some universal constant  $C > 0$ .

*Proof.* Conditioning on  $\mathcal{F}^{(i)}, \mathcal{E}^{(i,0)}, \mathcal{E}^{(i,1)}, \dots, \mathcal{E}^{(i,j)}$ , we have

$$\begin{aligned} \epsilon^{(i,0)}(k) &\leq c_1 \left[ \sqrt{\frac{\log(R'RK\delta^{-1})\sigma_k[V_{\theta^{(i,0)}}]}{m}} + \frac{\log(R'RK\delta^{-1})}{(1 - \gamma)m^{3/4}} \right] \\ &\leq c'_1 \left[ \sqrt{\frac{\log(R'RK\delta^{-1})\sigma_k[v^*]}{m}} + \frac{\log(R'RK\delta^{-1})}{(1 - \gamma)m^{3/4}} + 2^{-i} \sqrt{\frac{\log(R'RK\delta^{-1})}{(1 - \gamma)^2 m_1}} \right], \end{aligned}$$

for some generic constants  $c_1, c'_1$ , where we use the fact that  $\|V_{\theta^{(i,0)}} - v^*\|_\infty \leq 2^{-i}/(1 - \gamma)$  and the triangle inequality. Using the definition of  $\epsilon^{(i,j)}$  and the fact  $m_1 \leq m$ , we have

$$\begin{aligned} \epsilon^{(i,j)}(k) &= \epsilon^{(i,0)}(k) + c_2 2^{-i} \sqrt{\frac{\log(R'RK\delta^{-1})}{(1 - \gamma)^2 m_1}} \\ &\leq c'_2 \left[ \sqrt{\frac{\log(R'RK\delta^{-1})\sigma_k[v^*]}{m}} + \frac{\log(R'RK\delta^{-1})}{(1 - \gamma)m^{3/4}} + 2^{-i} \sqrt{\frac{\log(R'RK\delta^{-1})}{(1 - \gamma)^2 m_1}} \right], \end{aligned}$$

for some generic constants  $c_2, c'_2$ , where we use the fact that  $m \geq m_1$ . This concludes the proof. □



**D.5. Error Accumulation in One Outer Iteration**

**Lemma 11.** For  $i = 0, 1, 2, \dots, R'$ ,  $\Pr[\mathcal{G}^{(i+1)} | \mathcal{G}^{(i)}] \geq 1 - \delta / (R' + 1)$ .

*Proof of Lemma 11.* Conditioning on  $\mathcal{G}^{(i)}$ , suppose that the events  $\mathcal{E}^{(i,0)}, \mathcal{E}^{(i,1)}, \dots, \mathcal{E}^{(i,R)}$  all happen, which has probability at least  $1 - \delta / R'$  according to Lemma 9. For any  $s \in \mathcal{S}$ , we analyze the total error accumulated in the  $i$ -th outer iteration:

$$\begin{aligned}
 v^*(s) - V_{\theta^{(i,j)}}(s) &\leq \gamma P^{\pi^*}(\cdot | s)^\top (v^* - V_{\theta^{(i,j-1)}}) + 2\gamma \sum_k \phi_k(s, \pi^*(s)) \epsilon^{(i,j)}(k) && \triangleright \text{Lemma 8} \\
 &\leq \gamma^2 \sum_{s'} P^{\pi^*}(s' | s)^\top P^{\pi^*}(\cdot | s')^\top (v^* - V_{\theta^{(i,j-2)}}) + 2\gamma^2 P^{\pi^*}(\cdot | s)^\top \sum_k \phi_k(\cdot, \pi^*(\cdot)) \epsilon^{(i,j-1)}(k) \\
 &\quad + 2\gamma \sum_k \phi_k(s, \pi^*(s)) \epsilon^{(i,j)}(k) && \triangleright \text{applying Lemma 8 again on } v^* - V_{\theta^{(i,j-1)}} \\
 &\leq \dots && \triangleright \text{applying Lemma 8 recursively}
 \end{aligned}$$

$$\begin{aligned}
 &\leq \gamma^j [(P^{\pi^*})^j (v^* - V_{\theta^{(i,0)}})](s) + 2 \sum_{j'=0}^{j-1} \gamma^{j'+1} \sum_{k,s'} (P^{\pi^*})^{j'}_{s,s'} \phi_k(s', \pi^*(s')) \epsilon^{(i,j-j')}(k) \\
 &\leq \gamma^j (1 - \gamma)^{-1} + C \sum_{j'=0}^{j-1} \gamma^{j'+1} \left[ \frac{\log(R' RK \delta^{-1})}{(1 - \gamma) m^{3/4}} + 2^{-i} \sqrt{\frac{\log(R' RK \delta^{-1})}{(1 - \gamma)^2 m_1}} \right] \\
 &\quad + C \sum_{j'=0}^{j-1} \gamma^{j'+1} \sum_{s'} (P^{\pi^*})^{j'}_{s,s'} \cdot \sum_k \phi_k(s', \pi^*(s')) \sqrt{\frac{\log(R' RK \delta^{-1}) \sigma_k[v^*]}{m}} \\
 &\quad \triangleright \text{using } \|v^* - V_{\theta^{(i,0)}}\|_\infty \leq \frac{1}{1 - \gamma} \text{ and the upperbound of } \epsilon^{(i,j)} \text{ (Lemma 10)} \\
 &\leq \gamma^j (1 - \gamma)^{-1} + C \sum_{j'=0}^{j-1} \gamma^{j'+1} \left[ \frac{\log(R' RK \delta^{-1})}{(1 - \gamma) m^{3/4}} + 2^{-i} \sqrt{\frac{\log(R' RK \delta^{-1})}{(1 - \gamma)^2 m_1}} \right] \\
 &\quad + C \sum_{j'=0}^{j-1} \gamma^{j'+1} \sum_{s'} (P^{\pi^*})^{j'}_{s,s'} \cdot \sqrt{\frac{\log(R' RK \delta^{-1}) \sigma_{s', \pi^*(s')} [v^*]}{m}} \\
 &\quad \triangleright \text{applying Lemma 7} \\
 &= \gamma^j (1 - \gamma)^{-1} + C \frac{1 - \gamma^j}{1 - \gamma} \cdot \left[ \frac{\log(R' RK \delta^{-1})}{(1 - \gamma) m^{3/4}} + 2^{-i} \sqrt{\frac{\log(R' RK \delta^{-1})}{(1 - \gamma)^2 m_1}} \right] + \\
 &\quad C \sum_{j'=0}^{j-1} \gamma^{j'+1} \sum_{s'} (P^{\pi^*})^{j'}_{s,s'} \cdot \sqrt{\frac{\log(R' RK \delta^{-1}) \sigma_{s', \pi^*(s')} [v^*]}{m}},
 \end{aligned}$$

where  $C$  is a generic constant. By Lemma C.1 of (Sidford et al., 2018a) (a form of law of total variance for the Markov chain under  $\pi^*$ ), we have,

$$\sum_{j'=0}^{j-1} \gamma^{j'+1} \sum_{s'} (P^{\pi^*})^{j'}_{s,s'} \sqrt{\sigma_{s', \pi^*(s')} [v^*]} \leq C' \sqrt{(1 - \gamma)^{-3}}$$

for some generic constant  $C'$ . Combining the above equations, and setting

$$m = C'' \frac{1}{\epsilon^2} \cdot \frac{\log(R' RK \delta^{-1})^{4/3}}{(1 - \gamma)^3} \quad \text{and} \quad m_1 = C'' \cdot \frac{\log(R' RK \delta^{-1})}{(1 - \gamma)^2},$$

$R \geq \Theta[i \cdot (1 - \gamma)^{-1}]$  and  $2^{-i} / (1 - \gamma) \geq \Theta(\epsilon)$  for some generic constant  $C''$ , we can make the accumulated error as small as

$$v^*(s) - V_{\theta^{(i,R)}}(s) \leq c 2^{-i} / (1 - \gamma)$$

for some  $c > 0$ . Since  $V_{\theta^{(i+1,0)}}(s) = V_{\theta^{(i,R)}}(s)$  together with the monotonicity properties shown in Lemma 8, we obtain that conditioning on  $\mathcal{G}^{(i)}, \mathcal{E}^{(i,0)}, \mathcal{E}^{(i,1)}, \dots, \mathcal{E}^{(i,R)}$ , the event  $\mathcal{G}^{(i+1)}$  happens with probability 1.  $\square$

### D.6. Proof of Theorem 3

*Proof of Theorem 3.* Conditioning on  $\mathcal{G}^{(R')}$ , we have

$$\forall s \in \mathcal{S} : \quad 0 \leq v^*(s) - V_{\theta^{(R',R)}}(s) \leq 2^{-R'}/(1-\gamma).$$

Since  $R' = \Theta(\log[\epsilon^{-1}(1-\gamma)^{-1}])$ , we have  $|v^*(s) - V_{\theta^{(R',R)}}(s)| \leq \epsilon$ . Moreover, we have

$$v^*(s) - \epsilon \leq V_{\theta^{(R',R)}}(s) \leq \mathcal{T}_{\pi_{\theta^{(R',R)}}} V_{\theta^{(R',R)}}[s] \leq v^{\pi_{\theta^{(R',R)}}}[s] \leq v^*(s),$$

where the third inequality follows from monotonicity of  $\mathcal{T}_{\pi_{\theta^{(R',R)}}}$ . Therefore  $\pi_{\theta^{(R',R)}}$  is an  $\epsilon$ -optimal policy from any initial state  $s$ . Notice that  $\Pr[\mathcal{G}^{(i)}|\mathcal{G}^{(i-1)}] \geq 1 - \delta/R'$ , we have  $\Pr[\mathcal{G}^{(R')}] \geq \Pr[\mathcal{G}^{(R')} \cap \mathcal{G}^{(R-1)} \cap \dots \mathcal{G}^{(0)}] \geq 1 - \delta$ . Finally, one can show the main result by counting the number of samples needed by the algorithm.  $\square$
